# Supplementary material for: Biomolecular, Histological, Clinical, and Radiological Analyses of Dental Implant Bone Sites Prepared Using Magnetic Mallet Technology: A Pilot Study in Animals
Source: MDPI journal article supplement (doi:10.3390/ma14226945), 2021-11-17
Supplement: s1 [file s1]

Supplementary Material

# Biomolecular, Histological, Clinical, and Radiological Analyses of Dental Implant Bone Sites Prepared Using Magnetic Mallet Technology: A Pilot Study in Animals

Gianmario Schierano <sup>1,\*</sup>, Domenico Baldi <sup>2</sup>, Bruno Peirone <sup>3</sup>, Mitzy Mauthe von Degerfeld <sup>3</sup>, Roberto Navone <sup>4</sup>, Alberto Bragoni <sup>4</sup>, Jacopo Colombo <sup>2</sup>, Riccardo Autelli <sup>5</sup> and Giuliana Muzio <sup>5</sup>

<sup>1</sup> Department of Surgical Science, C.I.R Dental School, University of Turin, Via Nizza 230, 10126 Torino, Italy

<sup>2</sup> Department of Surgical Science (DISC), Division of Prosthetic Dentistry, University of Genoa, 16132 Genoa, Italy; baldi.domenico@libero.it (D.B.); jacopocolo@tiscali.it (J.C.)

<sup>3</sup> Department of Veterinary Sciences, University of Turin, Largo Paolo Braccini 2, Grugliasco, 10095 Torino, Italy; bruno.peirone@unito.it (B.P.); mitzy.mauthe@unito.it (M.M.v.D.)

<sup>4</sup> Department of Medical Science, University of Turin, Via Santena 5, 10126 Torino, Italy; navone.roberto@gmail.com (R.N.); alberto.bragoni@edu.unito.it (A.B.)

<sup>5</sup> Department of Clinical and Biological Sciences, University of Turin, Corso Raffaello 30, 10125 Torino, Italy; riccardo.autelli@unito.it (R.A.); giuliana.muzio@unito.it (G.M.)

\* Correspondence: gianmario.schierano@unito.it; Tel.: +39-(0)11-6331531/1532; Fax: +39-(0)11-6331513

**Table S1.** Primer sequences for PCR analysis.

| Gene           | Accession Number | Primer Sequences                                               |
|----------------|------------------|----------------------------------------------------------------|
| BMP-4          | NM_001101031     | FW 5'-ggcccctcctggtcacattt-3'<br>RV 5'-tccccatggcagtagaaggc-3' |
| TGF- $\beta$ 2 | XM_021064293     | FW 5'-gctgcctgcgtccactttac-3<br>RV 5'-cagagctccacaggtacggg-3'  |
| RUNX2          | XM_005666074     | FW 5'-ccccatccatccactccacc-3'<br>RV 5'-aggcagaagtcagaggtggc-3' |
| ALP            | AH012163.2       | FW 5'-tcactgctgaccactccac-3'<br>RV 5'-gggtttctgtccgtgtgc-3'    |
| OCN            | XM_013996978.2   | FW 5'-gttccccacctgtccacca-3'<br>RV 5'-ctccagcccatgatccagg-3'   |
| COLL1A1        | AF201723         | FW 5'-ggtgaacccggcaacaagg-3'<br>RV 5'-gctccctcacgtccagactc-3'  |
| BMP-7          | NM_001105290     | FW 5'-gaacagcagcagtgaccagc-3'<br>RV 5'-acgagttgagtggaagggc-3'  |
| IL-1 $\beta$   | M86725           | FW 5'-gcacactagggtcactggca-3'<br>RV 5'-gacactgctgttctggcc-3'   |
| IL-6           | JQ839263         | FW 5'-gggaaatgtcgaggctgtgc-3'<br>RV 5'-ttgtggtggggttaggggtg-3' |
| TNF $\alpha$   | X57321           | FW 5'-gagaatgaggggctggggac-3'                                  |

|        |                |                                                                |
|--------|----------------|----------------------------------------------------------------|
|        |                | RV 5'-tcttggtggtggtcagtgcc                                     |
| IL-10  | NM_214041      | FW 5'-tctacatgccagctcagc-3'<br>RV 5'-caggctggttggaagtga-3'     |
| IL-8   | M86923.1       | FW 5'-aggaccagagccaggaagaga3'<br>RV 5'-gccagaactgcagcctcaca-3' |
| WNT3a  | XM_021083340   | FW 5'-tgtgaacccaaccccgagac-3'<br>RV 5'-ctctcagtgcgtgcgttg-3'   |
| WNT5a  | XM_005669660.1 | FW 5'-gctgcggagacaacatcgac-3'<br>RV 5'-gcagggtcatgaggatgcgc-3' |
| WNT10b | KF569219       | FW 5'-gtgggaatggggtggtgta-3'<br>RV 5'-cgcatctgcctggatgctc-3'   |
| WNT16  | XM_003134736   | FW 5'-cagcggcaccaaggaaacag-3'<br>RV 5'-ctgagccgccattctgcaag-3' |
| GAPDH  | NM_001206359   | FW 5'-ctctctgctcctccccgttc-3'<br>RV 5'-ggccaaatccgttcactccg-3' |

All sequences used for designing primers are from Sus Scrofa. BMP-4, Bone Morphogenetic Protein-4; TGF- $\beta$ 2, Transforming Growth Factor- $\beta$ 2; RUNX2, RUNX Family Transcription Factor 2; ALP, Alkaline Phosphatase; OCN, Osteocalcin; COL1A1, Collagen 1A1; BMP-7, Bone Morphogenetic Protein-7; IL-1 $\beta$ , Interleukin-1 $\beta$ ; IL-6, Interleukin-6; TNF $\alpha$ , Tumor Necrosis Factor  $\alpha$ ; IL-10, Interleukin-10; IL-8, Interleukin-8; WNT, Wingless-related MMTV integration site; GAPDH, Glyceraldehyde 3-phosphate dehydrogenase.
